# Supplementary material for: The Disulfide Bond Cys255-Cys279 in the Immunoglobulin-Like Domain of Anthrax Toxin Receptor 2 Is Required for Membrane Insertion of Anthrax Protective Antigen Pore
Source: PLOS journal article supplement (doi:10.1371/journal.pone.0130832), 2015-06-24
Supplement: S2 (10.1371/journal.pone.0130832.s002) [file journal.pone.0130832.s002]

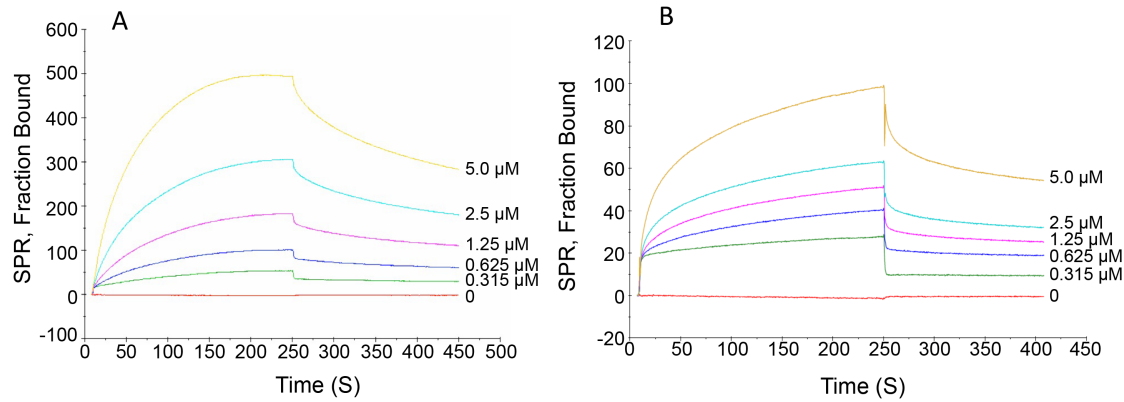

**S2 Figure: Surface plasmon resonance (SPR) analysis of PA-receptor binding affinity.** As indicated in an earlier report (14), the ultraslow dissociation kinetics made accurate measurement of the binding affinity between receptor and PA difficult using SPR. Here, using the TF-tagged receptors, TF-R318(WT) and TF-R318(C255/279A), we were able to measure the binding affinity between the TF-tagged receptors and PA<sub>83</sub>. Briefly, PA<sub>83</sub> was covalently coupled to a CM5 chip in a Biacore 100 system at 25°C. 2 μM of the protein was immobilized in sodium acetate pH 4.0 buffer at 5 μl min<sup>-1</sup> until the baseline reached <4,000 response units and then blocked with ethanolamine. Purified proteins of TF-R318(WT) (**A**) or TF-R318(C255/279A) (**B**) were diluted into HBS buffer (10mM Hepes pH 7.4, 150mM NaCl, 1 mM MgCl<sub>2</sub>) and serial injections were made at a constant flow rate of 10 μl min<sup>-1</sup>. Concentrations of receptor proteins ranged from 38nM to 5 μM. The CM5 chip was regenerated using 0.5 M NaCO<sub>3</sub> (pH 10.5) with a 30 μl pulse, resulting in <1% loss of base line per injection. Kinetic and affinity studies were done on a 1:1 fit model and steady state, respectively.

The binding kinetics and affinity are shown in **S1 Table** below:

Binding Kinetics and Affinity between TF-R318 receptors and PA<sub>83</sub>

|                                     | $k_a$ (1/Ms) | $k_d$ (1/s) | $K_D$ (M) | Affinity $K_D$ (M) |
|-------------------------------------|--------------|-------------|-----------|--------------------|
| TF-R318(WT): PA <sub>83</sub>       | 1222         | 0.001678    | 1.37E-06  | 5.91E-06           |
| TF-R318(C255/279A):PA <sub>83</sub> | 8075         | 7.71E-04    | 9.55E-08  | 9.24E-07           |

As indicated in **S1 Table**, compared to TF-R318(WT), TF-R318(C255/279A) has a slightly higher affinity to PA<sub>83</sub>, indicating that deletion of the disulfide bond C255-C279 does not reduce the binding affinity to PA<sub>83</sub>.
